# Supplementary material
Source: PubMed Central journal article supplement (PMC3631692)
Supplement: 1220910110_sapp.pdf [file 1220910110_sapp.pdf]

## SUPPLEMENTAL DATA – GFP-PSMA1 PIG

### EMBRYO TRANSFER OUTCOMES

Six embryo transfers were performed, transferring 881 embryos. Eight piglets were recovered at C-Section (six breathed). Five of the eight did not express and one healthy expressing male founder was identified.

| <u>Surrogate</u><br># | <u>#</u><br><u>Transferred</u> | <u>Day of</u><br><u>Surrogate</u> | <u>Status</u>                                                     |
|-----------------------|--------------------------------|-----------------------------------|-------------------------------------------------------------------|
| O727                  | 214                            | 1                                 | Cycled day 20                                                     |
| O709                  | 142                            | 1                                 | Cycled day 28                                                     |
| O731                  | 140                            | 0                                 | Delivered 5 (4 live) pigs 6/7/10 - none expressed                 |
| O762*                 | 140                            | 1                                 | Delivered 2 piglets 6/14/10 - one never breathed                  |
| O753                  | 120                            | 0                                 | Cycled day 25<br>2 piglets delivered 6/29/10 - one never breathed |
| O754                  | 125                            | 0                                 | and the other died on day 3                                       |

\*Surviving piglet expressed the transgene.

### TRANSGENIC OFFSPRING SEMEN ANALYSIS AND IVF

The sperm concentration of GFP offspring was significantly lower than wild type boar ( $0.4$  vs.  $1.5 \times 10^9$  spermatozoa/ml,  $p < 0.05$ ). Also the semen of GFP offspring showed high agglutination (head to head binding; **Suppl. Table 1**). Collected semen was diluted with X-Cell extender and sperm motility was measured during storage. The semen of GFP offspring showed 60-75% motility during storage, and the motility was significantly reduced on day 3 compared to the control wild type boar (87.5%,  $p < 0.05$ ; **Suppl. Table 2**).

There was no significant difference in monospermic fertilization between GFP offspring and wild type boar, however, the percentage of polyspermy was dramatically different (0.0% in GFP offspring vs. 63.9% in wild type boar,  $p < 0.05$ ; **Suppl. Table 3**). The percentage of cleaving embryos was significantly higher in wild type boar (68.8%) than in the GFP offspring (33.5%,  $p < 0.05$ ), but there was no significant difference in blastocyst formation rate (3.9% in GFP offspring vs. 3.4% in wild type boar). Additionally, mean cell number per blastocyst was higher in GFP offspring than in that of wild type boar (31.5 vs. 18.5;  $p < 0.05$ ; **Suppl. Table 4**). The expression of GFP was first detected in late 2 cell embryos and increased from 4-cell to blastocyst (56.0%; see **Fig. 3 B** in manuscript). We concluded that the male of GFP offspring was fertile *in vitro*.

**Supplemental Table 1: Comparison of semen characteristics between GFP offspring and wild type boars**

| <i>Boar</i>   | <i>Breed</i>   | <i>Boar No.</i> | <i>Collected semen volume (ml)</i> | <i>Sperm concentration (x10<sup>9</sup>/ml)</i> | <i>% motile spermatozoa</i> | <i>Notes</i>        |
|---------------|----------------|-----------------|------------------------------------|-------------------------------------------------|-----------------------------|---------------------|
| GFP offspring | Minnesota mini | G137            | 117.5±7.5 <sup>a</sup>             | 0.4±0.1 <sup>b</sup>                            | 75±5.0                      | High agglutinations |
| Wild type     | Duroc          | 89-10           | 50±0.0 <sup>b</sup>                | 1.5±0.1 <sup>a</sup>                            | 90±5.0                      | None                |

FOOTNOTES:

- Semen was collected twice from each boar.
- Mean±SEM for 2 ejaculates from each boar are shown.
- <sup>a,b</sup> Means in the same column with different superscripts differ significantly (p<0.05).

**Supplemental Table 2: Comparison of sperm motility (%) during storage**

| <i>Boar</i>   | <i>Storage period (day)</i> |          |                       |          |
|---------------|-----------------------------|----------|-----------------------|----------|
|               | <i>1</i>                    | <i>2</i> | <i>3</i>              | <i>4</i> |
| GFP offspring | 75±5.0                      | 75±5.0   | 65±5.0 <sup>b</sup>   | 60±5.0   |
| Wild type     | 92.5±2.5                    | 92.5±2.5 | 87.5±2.5 <sup>a</sup> | 87.5±2.5 |

FOOTNOTES:

- Boar semen was collected twice from each boar, diluted with X-Cell extender and stored at room temperature; sperm motility was assessed under stereomicroscope at 37.5°C.
- Mean±SEM for 2 ejaculates from each boar.
- <sup>a,b</sup> Means in the same column with different superscripts differ significantly (p<0.05).

**Supplemental Table 3: Comparison of fertilization parameters on porcine IVF**

| <i>Boar</i>   | <i>No. oocyte inseminated</i> | <i>% monospermic oocyte</i> | <i>% polyspermic oocyte</i> | <i>% total fertilization</i> |
|---------------|-------------------------------|-----------------------------|-----------------------------|------------------------------|
| GFP offspring | 49                            | 22.3±6.5                    | 0.0±0.0 <sup>b</sup>        | 22.3±6.5 <sup>b</sup>        |
| Wild type     | 51                            | 32.6±7.5                    | 63.9±9.7 <sup>a</sup>       | 96.5±3.6 <sup>a</sup>        |

FOOTNOTES:

- Experiment was repeated four times, and data indicate Mean±SEM.
- <sup>a,b</sup> Means in the same column with different superscripts differ significantly (p<0.05).

**Supplemental Table 4: Comparison of embryo development after IVF**

| <i>Boar</i>   | <i>No. oocytes inseminated</i> | <i>% cleaving oocytes</i> | <i>% blastocyst</i> | <i>Mean cell no. per blastocyst</i> | <i>% GFP expression from embryos</i> |
|---------------|--------------------------------|---------------------------|---------------------|-------------------------------------|--------------------------------------|
| GFP offspring | 56                             | 33.5±3.7 <sup>b</sup>     | 3.9±2.2             | 31.5±10.5                           | 56.0±9.7                             |
| Wild type     | 55                             | 68.8±8.1 <sup>a</sup>     | 3.4±2.0             | 18.5±1.5                            | None                                 |

FOOTNOTES:

- Experiment was repeated four times, and data indicate Mean±SEM.
- <sup>a,b</sup> Means in the same column with different superscripts differ significantly (p<0.05).

**METHODOLOGY FOR SEMEN COLLECTION, IVM, IVF, IMMUNOLUORESCENCE AND WESTERN BLOTTING**

**Semen collection and processing**

Ejaculates from wild type boar and the *PSMA1-GFP* transgenic Minnesota Mini boars were collected under the guidance of approved Animal Care and Use (ACUC) protocols of the University of Missouri, Columbia (UM). The wild-type boar was placed on a routine weekly collection while the transgenic boars were collected less frequently, as needed. Sperm-rich

fractions of the ejaculates with greater than 85% sperm motility and normal sperm acrosomes were used. Sperm concentrations were estimated using a hemacytometer (Fisher Scientific, Houston, TX, USA). The percentage of motile sperm was estimated at 38.5°C by light microscope at 250 x magnification. Semen was slowly cooled to room temperature (20°C) within 2 hrs after collection. Semen was then transferred into 15 ml tubes, centrifuged at room temperature for 10 min at 800 x g, and the supernatant was removed. The spermatozoa were processed according to each experiment's requirements and stored at -80°C. In order to use the semen for *in vitro* fertilization (IVF), the semen was diluted with X-Cell Extender (Cat. #USA851X, IMV Technologies, Maple Grove, MN; final concentration of  $1 \times 10^8$  spermatozoa/ml). The diluted semen was stored in a styrofoam box at room temperature for 5 days. Unless otherwise noted, all chemicals used in this study were purchased from Sigma Chemical Co. (St. Louis, MO).

### **Collection and *In Vitro* Maturation (IVM) of Porcine Oocyte**

Ovaries were collected from prepubertal gilts at a local slaughterhouse and transported to the laboratory in a warm box (25-30°C). Cumulus-oocyte complexes (COCs) were aspirated from antral follicles (3-6 mm in diameter), washed three times in HEPES-buffered Tyrode lactate (TL-HEPES-PVA) medium containing 0.01% (w/v) polyvinyl alcohol (PVA), then washed three times with the maturation medium [1]. Each time, a total of 50 COCs were transferred to 500  $\mu$ l of the maturation medium that had been covered with mineral oil in a 4-well multidish (Nunc, Roskilde, Denmark) and equilibrated at 38.5°C, with 5% CO<sub>2</sub> in air. The medium used for oocyte maturation was tissue culture medium (TCM) 199 (Gibco, Grand Island, NY) supplemented with 0.1% PVA, 3.05 mM D-glucose, 0.91 mM sodium pyruvate, 0.57 mM cysteine, 0.5  $\mu$ g/ml LH (L5269, Sigma), 0.5  $\mu$ g/ml FSH (F2293, Sigma), 10 ng/ml epidermal growth factor (E4127, Sigma), 10% porcine follicular fluid, 75  $\mu$ g/ml penicillin G, and 50  $\mu$ g/ml streptomycin. After 22 h of culture, the oocytes were washed twice and cultured in TCM199 without LH and FSH for 22 h at 38.5°C, 5% CO<sub>2</sub> in air.

### ***In Vitro* Fertilization (IVF) and Culture (IVC) of Porcine Oocytes**

After IVM, cumulus cells were removed with 0.1% hyaluronidase in TL-HEPES-PVA medium and ova were washed three times with TL-HEPES-PVA medium and three times with Tris-buffered (mTBM) medium [1] containing 0.2% BSA (A7888, Sigma). Thereafter, 20 oocytes were placed into each of four 100  $\mu$ l drops of the mTBM medium, which had been covered with mineral oil in a 35 mm polystyrene culture dish. The dishes were allowed to equilibrate in the incubator for 30 min until spermatozoa were added for fertilization. One ml liquid semen preserved in X-Cell Extender was washed twice in PBS containing 0.1% PVA (PBS-PVA) at 800xg for 5 min, respectively. At the end of the washing procedure, the spermatozoa were resuspended in mTBM medium. After appropriate dilution, 1  $\mu$ l of this sperm suspension was added to the medium that contained oocytes to give a final sperm concentration of  $5 \times 10^5$  sperm/ml. Oocytes were co-incubated with spermatozoa for 6 hrs at 38.5°C, 5% CO<sub>2</sub> in air. At 6

hrs after IVF, oocytes were transferred into 500  $\mu$ l PZM-3 medium [2] containing 0.4% BSA (A6003, Sigma) for further culture during 16-19 hrs or 144 hrs.

### **Evaluation of Oocyte Fertilization and Embryo Culture**

Semen collection, in vitro oocyte maturation and in vitro fertilization were performed using standard methods described in **Supplemental Data** File. For evaluation of fertilization, oocytes/zygotes or embryos were fixed with 2% formaldehyde for 40 min at room temperature, washed with PBS three times, permeabilized with PBS-TX for 40 min at room temperature, and stained with 2.5  $\mu$ g/ml DAPI (Molecular Probes, Eugene, OR) for 40 min. Sperm penetration and fertilization status of the zygotes (unfertilized, fertilized-monospermic or fertilized-polyspermic) or the number of nuclei in embryos/blastocyst were assessed under epifluorescence microscope. Image acquisition was performed on a Nikon Eclipse 800 microscope (Nikon Instruments Inc., Melville, NY) with Cool Snap camera (Roper Scientific, Tucson, AZ) and MetaMorph software (Universal Imaging Corp., Downingtown, PA). The same imaging system was used for the analysis of tissue fragments collected from stillborn transgenic siblings of the founder boar; microscopic tissue fragments were whole-mounted on ceroscopy slides in TL-HEPES medium with 10% PVP and directly imaged under epifluorescence illumination at the excitation wave length corresponding to peak excitation wavelength of GFP. To assure that the resultant signals were not due to autofluorescence, control acquisitions were also made in the UV and red excitation & emission bands. None of the GFP-patterns described in this study were observed in tissues of non-transgenic offspring.

### **Immunofluorescence of Boar Spermatozoa**

Spermatozoa were affixed to poly-lysine treated microscopy coverslips and fixed in 2% formaldehyde, washed, permeabilized in PBS with 0.1% Triton-X-100 (PBS-TX) and blocked in PBS-TX containing 5% normal goat serum. Spermatozoa were incubated with mouse monoclonal antibody raised against the green fluorescent protein (GFP) from the jellyfish *Aequorea victoria* (1:100 dilution, cat #33-2600; Zymed Laboratories Inc., South San Francisco, CA, USA) overnight. Then they were incubated in PBS-TX containing 1% normal goat serum with goat-anti-mouse (GAM)-IgG-FITC (1:100 dilution; Zymed – Invitrogen) and DAPI (1:100; Molecular Probes - Invitrogen) for 40 min. Image acquisition was performed as described for oocytes.

### **Western blotting**

Sperm were washed in protein-free PBS and sperm concentration was determined using a hemocytometer so that approximately  $1 \times 10^9$  spermatozoa/ml were loaded per lane after extraction. Spermatozoa were washed again in PBS and boiled for 5 min with loading buffer (50 mM Tris (pH 6.8), 150 mM NaCl, 2% SDS, 20% glycerol, 5%  $\beta$ -mercaptoethanol, 0.02% bromophenol blue). Gel electrophoresis of 10  $\mu$ l total protein/lane was performed on 4-20% gradient gels (PAGEr Gels, Lonza, Rockland, ME), followed by protein transfer to PVDF

membranes (Immobilon P, Millipore Corp., Billerica, MA) using an Owl wet transfer system (Fisher Scientific, Houston, TX) at a constant 50 V for 4 hrs. The membranes were sequentially incubated with 10% non-fat milk for 1 hr and with one of the following antibodies: mouse monoclonal anti-GFP antibody (1:2000 dilution, cat. # 33-2600; Zymed - Invitrogen), mouse monoclonal anti-GFP antibody (1:2000 dilution, cat. #A11120; Invitrogen), mouse monoclonal anti-PSMA1/ $\alpha$ -6 proteasome subunit (1:2000 dilution, cat. #PW9390; Enzo), mouse monoclonal anti-proteasome 20S core subunits alpha-type 1,2,3,5,6, & 7 (1:2,000 dilution, cat. #PW8195; Enzo), mouse monoclonal anti-proteasome 20S core antibodies (1:2,000 dilution, cat. #PW8155; Enzo), or mouse monoclonal anti-MFGE8 antibody (1:1,000 dilution, cat. #D199-3; MBL) overnight. The membranes were washed and incubated with an appropriate species-specific secondary antibody such as the HRP-conjugated goat-anti-mouse (GAM-IgG-HRP), HRP-goat-anti-rabbit IgG or goat-anti-Armenian hamster IgG-HRP antibodies (1:10,000 dilution; used to detect anti-MFGE8 antibody) for 1 hr at room temperature in 1% nonfat dry milk in TBS/Tween. The membranes were washed and reacted with 1.5 mL of chemiluminescent substrate (Illuminata Crescendo, Millipore Corp., Billerica, MA) for 5 min prior to being exposed to Kodak BioMax Light film (Kodak, Rochester, NY, USA).

### **Immunoprecipitation and MALDI-TOF Mass Spectroscopy**

Boar sperm extracts were immunoprecipitated with the anti-GFP antibody (catalog no. A11120; Invitrogen) by using the Seize X Protein G Immunoprecipitation Kit (Pierce), separated on 4–20% gradient gels (PAGEr Gels; Lonza) and stained with Coomassie blue. The immunoprecipitated bands were excised carefully from the Coomassie blue-stained gel, destained, reduced with DTT, alkylated with iodoacetamide, and then trypsinized overnight. The digest solutions were recovered from the gel pieces and transferred to Axygen MAXYMum Recovery microtubes. The gel pieces were extracted further, pooled, and lyophilized dry. The dried digests were reconstituted and analyzed by Nano-LCNanospray quadrupole time-of-flight MS plus MS/MS on an Agilent 6520A mass spectrometer. The “MS plus MS/MS” data were analyzed with the “Find Compounds by Auto MS/MS” program in the Agilent Mass Hunter software (version B.04.00) suite. The MALDI-TOF MS spectra peak lists were obtained for the spectra after internal recalibration using trypsin autolysis fragment masses, computer baseline correction, noise removal, and peak de-isotoping. The threshold for generating peak lists was set to 2% of the maximum observed peak area. Data were exported in the Mascot Generic Format (.mgf) for submission to an in-house copy of Matrix Science’s Mascot program ([www.matrixscience.com](http://www.matrixscience.com)). Database searches were performed against the NCBI Inr Mammalian protein databases (last updated September 19, 2011) and were adjusted for trypsin digestion with no missed cleavage, fixed modification by carbamidomethylation, and variable modification by methionine oxidation. Mowse and Mascott ion scores were used to identify highly probable matches with known amino acid sequences.

## **Statistical Analysis**

Analyses of variance were carried out using the Statistical Analysis Software package in a completely randomized design. Duncan's multiple range test was used to compare values of individual treatment when the F-value was significant ( $P < 0.05$ ).

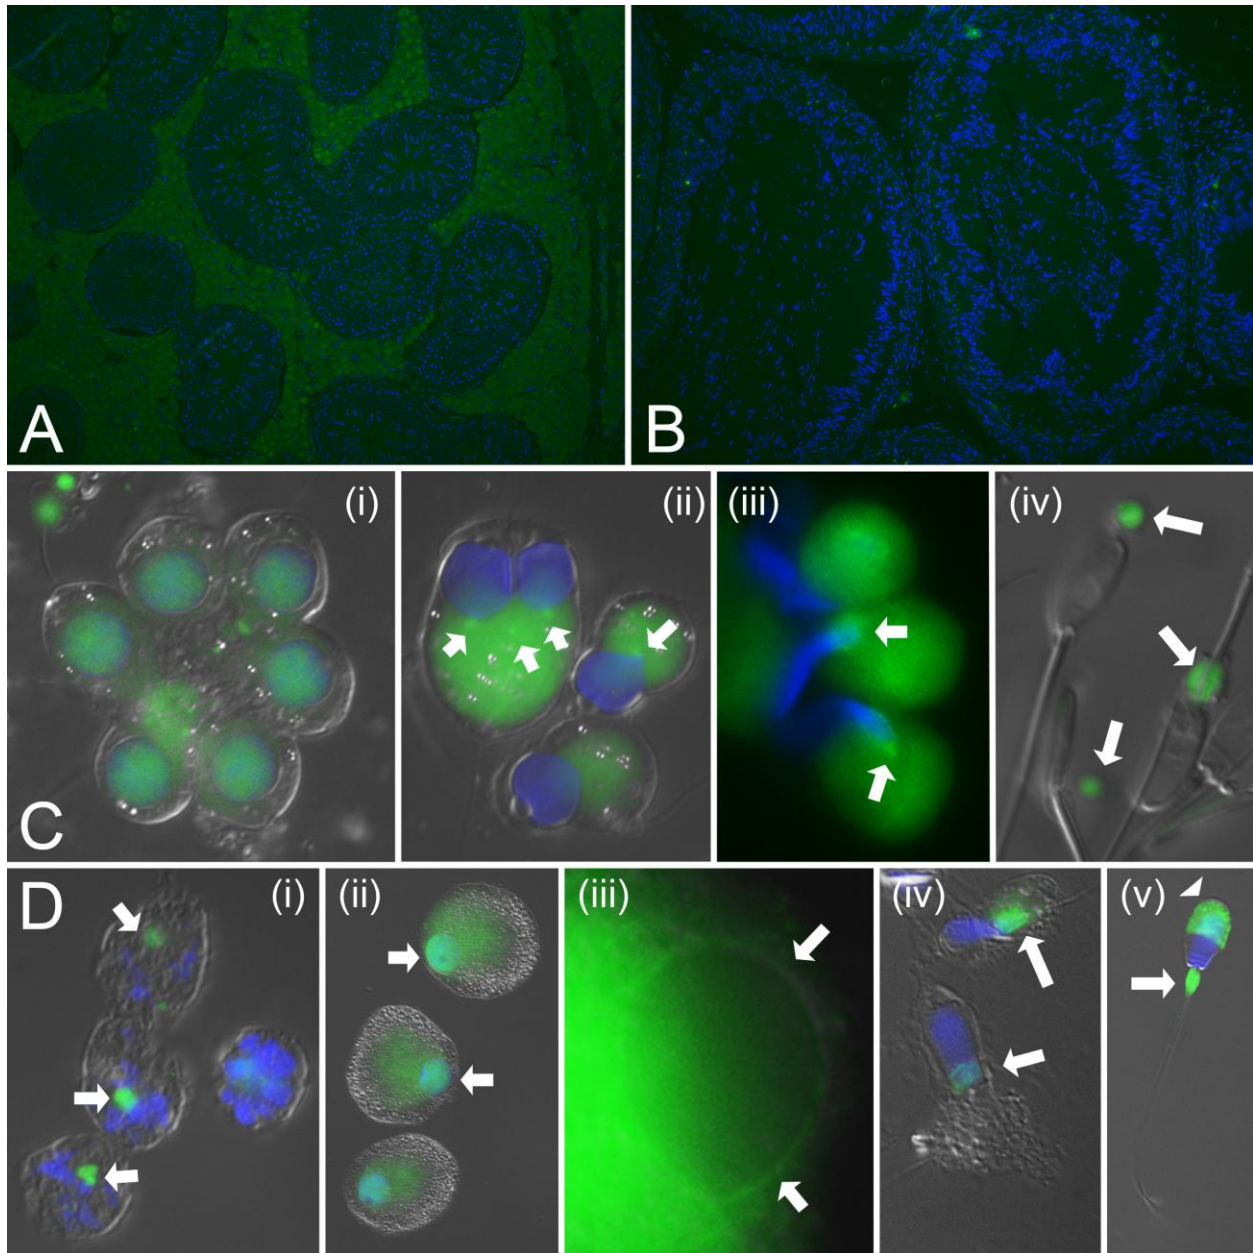

**Supplemental Figure 1.** Histological and immunocytochemical analysis of the gonads and testicular germ cells of the founder PSMA1-GFP boar. (A, B) Histology of adult transgenic male gonads reveals normal testicular (A) and epididymal (B) tissue architecture, normal spermatogenesis in the testis (A) and abundant spermatozoa within the epididymal tubule lumen (B). (C) Live cell imaging of PSMA1-GFP fluorescence in the germ cells of founder boar. Green fluorescence is visible in the nuclei of round spermatids (i), at the base of the nucleus, probably the chromatoid body or the site of flagellum biogenesis (arrows) in the early step elongating spermatids (ii), in the caudal manchette (arrows) of elongated spermatids (iii), and in the cytoplasmic droplets (arrows) of fully differentiated spermatozoa (iv). Green color channel was



contrast-enhanced due to its low intensity. **(D)** Amplification of PSMA1-GFP1 fluorescence by anti-GFP antibody in the fixed, permeabilized testicular cells of the founder boar. Fluorescence is concentrated in the chromatoid bodies (arrows) of secondary spermatocytes (i), in the nuclei (arrows) of round spermatids, in the subacrosomal/inner acrosomal membrane layer (arrows) of an early step elongating spermatid (iii), in the caudal manchette (iii) of the elongated spermatids (iv), and in the acrosomal cap (arrowhead) and cytoplasmic droplet (arrow) of a fully differentiated testicular spermatozoon. The localization of PSMA1-GFP in panels C and D corroborates previous reports of proteasomal subunit localization in the hotspots of spermatid protein recycling such as the nucleus, redundant nuclear envelopes, caudal manchette, acrosomal cap and cytoplasmic droplet [3-6]. Localization of a proteasomal subunit to the chromatoid body is reported for the first time.

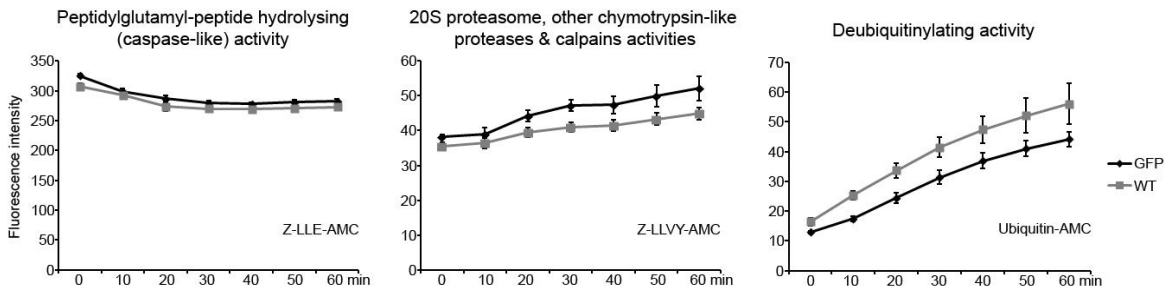

**Supplemental Figure 2.** Comparisons of proteasomal-proteolytic activities in spermatozoa of PSMA1-GFP offspring (GFP) and wild type boars (WT). Proteasomal proteolytic and deubiquitinating activities were measured using specific fluorometric substrates Z-LLE-AMC, Z-LLVY-AMC, and ubiquitin-AMC, respectively. The relative emitted fluorescence (no units) was measured at multiple time points to follow the kinetics of the reaction (ex: 380 nm, em: 460 nm). Experiments were repeated six times (with two different WT boars as a control). Values are expressed as the mean of fluorescence intensity $\pm$ SEM.

**Methodology:** Proteasomal-proteolytic activity of boar spermatozoa was measured by a standard fluorometric proteasomal substrate assay as described [7]. Spermatozoa preserved in X-cell Extender were loaded onto a 96-well black plate (final sperm con.  $1 \times 10^6$  spermatozoa/ml), and incubated at 37.5°C with Z-LLE-AMC (a specific substrate for 20S chymotrypsin-like peptidyl-glutamylpeptide hydrolyzing [PGPH] activity, final conc. 100  $\mu$ M; Enzo Life Sciences, Plymouth, PA), Z-LLVY-AMC (a specific substrate for 20S proteasome other chymotrypsin-like proteases and calpains; final con. 100  $\mu$ M; Enzo), or ubiquitin-AMC (a specific substrate for deubiquitinating activity; final conc. 300 nM; Enzo). The emitted fluorescence (no units) was measured every 10 min for a period of 1 hr, yielding a curve of relative fluorescence (excitation: 355 nm, emission: 460, Thermo Fluoroskan, ThermoFisher Scientific).

**Supplemental Table 5 A: Proteasomal Subunits and Putative Proteasome-Interacting Proteins Co-immunoprecipitated with Anti-GFP-Antibody**

| <u>Protein annotation</u>                                                                                        | <u>NCBI gi #</u> | <u>Score</u> | <u>% Coverage</u> | <u>MW (kDa)</u> |
|------------------------------------------------------------------------------------------------------------------|------------------|--------------|-------------------|-----------------|
| <b>A- PROTEASOMAL SUBUNITS</b>                                                                                   |                  |              |                   |                 |
| Proteasome subunit alpha type-1 like                                                                             | 311248177        | 440          | 41                | 29.5            |
| Proteasome subunit alpha type-3 isoform 1                                                                        | 194034201        | 985          | 39                | 28.4            |
| Proteasome subunit alpha type-3 isoform 2                                                                        | 194034199        | 985          | 40                | 27.6            |
| Proteasome subunit alpha type-4                                                                                  | 347300165        | 1171         | 59                | 29.5            |
| Proteasome subunit alpha type-4 isoform 1                                                                        | 347300165        | 669          | 64                | 29.5            |
| Proteasome subunit alpha type-5                                                                                  | 222136590        | 654          | 55                | 26.4            |
| Proteasome subunit alpha type-6                                                                                  | 8394076          | 1092         | 41                | 27.4            |
| Proteasome subunit alpha type-7-like isoform 1                                                                   | 311259068        | 601          | 65                | 27.9            |
| Proteasome (prosome, macropain) subunit, alpha type (alpha 7)                                                    | 343887360        | 467          | 58                | 27.8            |
| Proteasome subunit beta type-2 isoform 1                                                                         | 4506195          | 638          | 61                | 22.8            |
| Proteasome subunit beta type-2 isoform 2                                                                         | 315139006        | 638          | 69                | 20.2            |
| Proteasome subunit beta type-5                                                                                   | 335292522        | 2006         | 59                | 30.1            |
| Proteasome subunit beta type-6                                                                                   | 344259274        | 566          | 61                | 25.4            |
| Full-proteasome subunit beta type-7                                                                              | 194034199        | 275          | 39                | 30              |
| Chain H, Crystal Structure of the Mammalian 20s Proteasome at 2.75 A Resolution (Proteasome subunit beta type-6) | 21465649         | 607          | 65                | 21.9            |
| <b>B-OTHER SPERM PROTEINS</b>                                                                                    |                  |              |                   |                 |
| <b><u>Spermadhesins &amp; Acrosome Associated Proteins</u></b>                                                   |                  |              |                   |                 |
| Spermadhesin AWN                                                                                                 | 66990208         | 761          | 74                | 16.9            |
| Major Seminal Plasma Glycoprotein PSP-I precursor                                                                | 47523176         | 275          | 46                | 14.5            |
| Seminal Plasma Sperm Motility Inhibitor                                                                          | 72535165         | 419          | 69                | 15              |
| Seminal Plasma Protein pB1 precursor                                                                             | 47523184         | 178          | 43                | 15.4            |
| Acrosin-binding protein (degradation product)                                                                    | 75052483         | 940          | 26                | 60.5            |
| Seminal Plasma Acrosin Inhibitor A1                                                                              | 123986           | 177          | 67                | 7.6             |
| <b><u>Disintegrin/ADAM-Family Proteins</u></b>                                                                   |                  |              |                   |                 |
| Disintegrin and metalloproteinase domain-containing protein 5                                                    | 323276507        | 443          | 23                | 45.1            |
| Disintegrin and metalloproteinase domain-containing protein 20-like                                              | 311261282        | 322          | 26                | 82.5            |
| <b><u>Other Sperm Proteins &amp; GFP</u></b>                                                                     |                  |              |                   |                 |
| Lactadherin                                                                                                      | 172072653        | 1264         | 49                | 47.8            |
| Enhanced Green Fluorescent Protein                                                                               | 13194618         | 713          | 42                | 27              |
| Ropporin-1-like                                                                                                  | 301783203        | 404          | 33                | 23.9            |

**Supplemental Table 5 B: Immunoprecipitation & MS/MS Identification of Proteasome Interacting Sperm Proteins.** Identified peptides are shown in red.

**Proteasomal Subunits:**

| <u>Protein</u>                                                                                                                                                                                                                                                                                                                                                                                                                                                                                                                                                                                                                                                                                                                                            | <u>NCBI gi #</u> | <u>Score</u> | <u>% Coverage</u> | <u>MW (kDa)</u> |
|-----------------------------------------------------------------------------------------------------------------------------------------------------------------------------------------------------------------------------------------------------------------------------------------------------------------------------------------------------------------------------------------------------------------------------------------------------------------------------------------------------------------------------------------------------------------------------------------------------------------------------------------------------------------------------------------------------------------------------------------------------------|------------------|--------------|-------------------|-----------------|
| Proteasome subunit<br>alpha type-1 like                                                                                                                                                                                                                                                                                                                                                                                                                                                                                                                                                                                                                                                                                                                   | 311248177        | 440          | 41                | 29.5            |
| 1 mfrnqy <del>ndv</del> <b>tw</b> spqgri <b>h</b> <b>q</b> ieyameavk qgsatvglks kthavlvalk raqselaahq<br>61 <b>k</b> il <del>hdn</del> hi <b>g</b> isiagltad <b>ar</b> llcnfmrq ecldsr <b>fv</b> fd <b>r</b> plpvsrlvs <b>l</b> igsktqi <b>pt</b><br>121 qrygrrpygv glliagyddm gphifqtcp <b>s</b> anyfdcr <b>am</b> s igarsqsart yler <b>hm</b> se <b>fm</b><br>181 <b>ec</b> nl <b>nel</b> vk <b>h</b> glralret <b>lp</b> <b>ae</b> qdl <b>tt</b> knv <b>si</b> g <b>iv</b> gkdle ftiydd <b>dv</b> s pflegleerp<br>241 qrkaqpaqpa depaekadep meh                                                                                                                                                                                                         |                  |              |                   |                 |
| Proteasome subunit<br>alpha type-3 isoform<br>1                                                                                                                                                                                                                                                                                                                                                                                                                                                                                                                                                                                                                                                                                                           | 194034201        | 985          | 39                | 28.4            |
| 1 <b>m</b> ssigtgydl <b>s</b> astfspdgr <b>vf</b> qveyamka <b>ve</b> nsstaigi <b>r</b> ckdgv <b>vf</b> gv <b>ek</b> lvlsklye<br>61 eg <b>sn</b> kr <b>l</b> fnv dr <b>h</b> vg <b>m</b> avag <b>ll</b> adarslad iareeas <b>nf</b> r <b>sn</b> fg <b>yn</b> iplk h <b>l</b> adrvamyv<br>121 haytlysavr pfgcsfmlgs ysvndgaqly midpsgvsy <b>g</b> ywgcaigkar qaakteiekl<br>181 qmkem <b>tc</b> rdv vkevaki <b>iyi</b> <b>vh</b> devkd <b>kaf</b> <b>el</b> elsw <b>gei</b> <b>tk</b> grheivpk direeaekya<br>241 keslkeedes dddnm                                                                                                                                                                                                                             |                  |              |                   |                 |
| Proteasome subunit<br>alpha type-3 isoform<br>2                                                                                                                                                                                                                                                                                                                                                                                                                                                                                                                                                                                                                                                                                                           | 194034199        | 985          | 40                | 27.6            |
| 1 <b>m</b> ssigtgydl <b>s</b> astfspdgr <b>vf</b> qveyamka <b>ve</b> nsstaigi <b>r</b> ckdgv <b>vf</b> gv <b>ek</b> lvlsklye<br>61 eg <b>sn</b> kr <b>l</b> fnv dr <b>h</b> vg <b>m</b> avag <b>ll</b> adarslad iareeas <b>nf</b> r <b>sn</b> fg <b>yn</b> iplk h <b>l</b> adrvamyv<br>121 haytlysavr pfgcsvndga qlymidpsgv sygywgcaig karqaaktei eklqmkemtc<br>181 rdvvkevaki <b>iyivh</b> devkd <b>kaf</b> e <b>le</b> lsw <b>gei</b> tkgrhei vpkdireeae kyakeslkee<br>241 desddnm                                                                                                                                                                                                                                                                      |                  |              |                   |                 |
| Proteasome subunit<br>alpha type-4                                                                                                                                                                                                                                                                                                                                                                                                                                                                                                                                                                                                                                                                                                                        | 347300165        | 1171         | 59                | 29.5            |
| 1 msrrydsr <b>tt</b> <b>if</b> speg <b>r</b> lyq veyameaigh agtclgilan dgvl <b>l</b> aaerr nih <b>k</b> l <b>l</b> devf<br>61 <b>f</b> sekiy <b>k</b> l <b>ne</b> <b>dm</b> acsvag <b>it</b> <b>sd</b> anvlt <b>ne</b> l <b>r</b> liaq <b>r</b> yll <b>q</b> <b>y</b> qepip <b>ce</b> ql <b>vt</b> alcd <b>ik</b> qa<br>121 ytqfgg <b>k</b> r <b>pf</b> <b>gv</b> s <b>l</b> lyig <b>wd</b> <b>kh</b> ygf <b>q</b> ly <b>qs</b> <b>dp</b> sgny <b>gg</b> wk <b>at</b> cig <b>nn</b> saa <b>av</b> sml <b>k</b> q <b>dy</b> k<br>181 <b>eg</b> em <b>tl</b> ksal <b>al</b> aikvlnkt mdvsk <b>l</b> saek <b>ve</b> iat <b>l</b> tren gktvirvl <b>k</b> q <b>ke</b> veq <b>l</b> ikk <b>h</b><br>241 eeeeakaere kkekeqkekd k                                 |                  |              |                   |                 |
| Proteasome subunit<br>alpha type-4 isoform<br>1                                                                                                                                                                                                                                                                                                                                                                                                                                                                                                                                                                                                                                                                                                           | 347300165        | 669          | 64                | 29.5            |
| 1 msrrydsr <b>tt</b> <b>if</b> speg <b>r</b> ly <b>q</b> <b>ve</b> yameaigh <b>ag</b> tclgilan <b>dg</b> vl <b>l</b> aaerr nih <b>k</b> l <b>l</b> devf<br>61 <b>f</b> sekiy <b>k</b> l <b>ne</b> <b>dm</b> acsvag <b>it</b> <b>sd</b> anvlt <b>ne</b> l <b>r</b> liaq <b>r</b> yll <b>q</b> <b>y</b> qepip <b>ce</b> ql <b>vt</b> alcd <b>ik</b> qa<br>121 ytqfgg <b>k</b> r <b>pf</b> <b>gv</b> s <b>l</b> lyig <b>wd</b> <b>kh</b> ygf <b>q</b> ly <b>qs</b> <b>dp</b> sgny <b>gg</b> wk <b>at</b> cig <b>nn</b> saa <b>av</b> sml <b>k</b> q <b>dy</b> k<br>181 <b>eg</b> em <b>tl</b> ksal <b>al</b> aikvlnkt mdvsk <b>l</b> saek <b>ve</b> iat <b>l</b> tren gktvirvl <b>k</b> q <b>ke</b> veq <b>l</b> ikk <b>h</b><br>241 eeeeakaere kkekeqkekd k |                  |              |                   |                 |

|                                    |           |     |    |      |
|------------------------------------|-----------|-----|----|------|
| Proteasome subunit<br>alpha type-5 | 222136590 | 654 | 55 | 26.4 |
|------------------------------------|-----------|-----|----|------|

1 **mfltr**seydr gvntfspegr **lfqveyaiea** **iklgstaigi** **qtsegvclav** **ekritsplme**  
61 **pssi**ekivei dahigcamsg liadaktlid karvetqnhw ftynetmtve svtqavslnla  
121 lqfgeedadp gamsrpfava llfggvdek **pqlfhmdpsg** **tfvqcdarai** **gsasegaqss**  
181 **lqevy**ksmt lkeaikssli **ilkqvmee**kl **natnielatv** **qpgqnfhmft** **keeleevikd**  
241 **i**

|                                    |         |      |    |      |
|------------------------------------|---------|------|----|------|
| Proteasome subunit<br>alpha type-6 | 8394076 | 1092 | 41 | 27.4 |
|------------------------------------|---------|------|----|------|

1 msrgssagfd **rhitifspeg** **rlyqveyafk** **ainqggltsv** **avrgkdcavi** vtqkkvpdkl  
61 ldsstvtlhf **kitenigcvm** **tgmtadrsr**sq vqraryeaan wkykygyeip **vdmlckriad**  
121 isqvytqnae mrplgccmil igideeqgpq vyk**cdpagyy** **cgfkataagv** **kqtestsfle**  
181 **kkvkkk**fdwt feqtvetai clstvlisidf kpseievgvv tvenpkfril **teaeidahlv**  
241 **alaerd**

|                                                      |           |     |    |      |
|------------------------------------------------------|-----------|-----|----|------|
| Proteasome subunit<br>alpha type-7-like<br>isoform 1 | 311259068 | 601 | 65 | 27.9 |
|------------------------------------------------------|-----------|-----|----|------|

1 masrydr**ait** **vfspdghlfq** **veyaqeavkk** gstavairgt **divvlgvekk** svaklqdert  
61 vr**kicalddh** **vcmafaghta** darvvinarar vecqshkl**tv** **edpvtveyit** rfiatlkkqky  
121 **tqsn**rrpfg **isalivgfd**d dgiprlyqtd **psgtyhawk**a naigrsaktv reflekn**yte**  
181 **daiand**neai klairallev **vqsggkniel** **aiirrnqplk** mfsakeielq **vneiekeke**  
241 **ae**kkksskta

|                                                              |           |     |    |      |
|--------------------------------------------------------------|-----------|-----|----|------|
| Proteasome<br>(prosome,<br>macropain) subunit,<br>alpha type | 343887360 | 467 | 58 | 27.8 |
|--------------------------------------------------------------|-----------|-----|----|------|

1 msydr**aitvf** **spdghlfqve** **yaqea**kkgs tavgvrgrdi **vvlgvekk**sv arlqdertvr  
61 **kicalddnvc** **mafaghtada** rivinararve cqshrl**tv**ed **pvtveyit**ry iaslkkrytq  
121 sngr**rpfgis** **alivgfd**fdg tprlyqtdps **gtyhawk**ana igrgaksvre flekn**ytdea**  
181 **ietd**gl**tikl** vikalle**vq** **sggknielav** mrrdqplkil **npeeikyva** **eiekeke**ene  
241 kkkqkkas

|                                                |         |     |    |      |
|------------------------------------------------|---------|-----|----|------|
| Proteasome subunit<br>beta type-2 isoform<br>1 | 4506195 | 638 | 61 | 22.8 |
|------------------------------------------------|---------|-----|----|------|

1 meyligiqgp dyvlvasdrv aasnivqmkd dhdkmfkms **killlc**vgea **gdtvqfaeyi**  
61 **qknv**qlykmr **ngyelspta**a anft**rnlad** clsr**tpyhv** **nllagydeh** **egpalyymdy**  
121 **laalakapfa** **ahgygaf**tl **sildryy**tp **isreravell** rkcleelqkr **filnlptfsv**  
181 **riidkngihd** **ldnisfpk**qg s

|                                                |           |     |    |      |
|------------------------------------------------|-----------|-----|----|------|
| Proteasome subunit<br>beta type-2 isoform<br>2 | 315139006 | 638 | 69 | 20.2 |
|------------------------------------------------|-----------|-----|----|------|

1 meylidhdkm fkmsekilll **cvgeagdtvq** **faeyiqk**nvq lyk**mrngyel** **sptaaanft**r  
61 **rnladclsr** **tpyhvnllla** **gydehe**gal **yymdylaala** **kapfaahgyg** **aftlsildr**  
121 **yytptis**rer avellrkcle elqkr**filnl** **ptfsvriidk** **ngihldnis** **fpkqgs**

|                                   |           |      |    |      |
|-----------------------------------|-----------|------|----|------|
| Proteasome subunit<br>beta type-5 | 335292522 | 2006 | 59 | 30.1 |
|-----------------------------------|-----------|------|----|------|

1 mfwrvvpfpl ldmalasvle rplavnrrgf fgfggradll dlpggspgdg lslvapswgv  
61 peepriemlh gtttlafkfl **hgvivaadsr atagayiasq tvkkvieinp yllgtmagga**  
121 **adcsfwer**ll arqcriyelr nkerisvaaa skllanmvyq **ykmgmlsmgt micgwdkrgp**  
181 **glyyvdsegn risgatfsvg sgsvyaygvm drgysydlev eqaydlarra iyqatyrday**  
241 **sggsvnlyhv redgwirvss dnvadlhky sestp**

|                                   |           |     |    |      |
|-----------------------------------|-----------|-----|----|------|
| Proteasome subunit<br>beta type-6 | 344259274 | 553 | 61 | 25.4 |
|-----------------------------------|-----------|-----|----|------|

1 maatlvaarg aglapawghe aitpdwenre vstggtimav qfdggvvlga dsrtrttgsyi  
61 anrvtdkltp ihdrifccrs **gsaadtqava davtyqlgfh sielneplv htaaslfkem**  
121 **cyrredlma giivagwdpq eggqvysvpm ggmmvrqafa iggsgssyiy gyvdatyreg**  
181 **mtkeecqlft analalamer dgssggvirl aaiaesgver qvllgdqpk ftiatlppp**

|                                        |           |     |    |    |
|----------------------------------------|-----------|-----|----|----|
| Full-proteasome<br>subunit beta type-7 | 160419232 | 275 | 39 | 30 |
|----------------------------------------|-----------|-----|----|----|

1 maavsvyerp vggfsfdncr rnaileadfa kkgyklptar ktgttiagvv **ykdgivlgad**  
61 **trategmvva dkncskihfi spniyccgag taadtdmttq lissnlelhs lstgrlprvv**  
121 tanrmlk**qml fryqgyigaa lvlggvdvtg phlysiyphg stdklpyvtm gsgslaamav**  
181 **fedkfrpeme eeeakqlvse aiaagifndl gsgsnidlc v iskskldflr pysvvpnkkg**  
241 rfgryrcekgt ttavltekvt **aldievleet vqtmtds**

|                                                                                             |          |     |    |      |
|---------------------------------------------------------------------------------------------|----------|-----|----|------|
| Chain H, Crystal<br>Structure of the<br>Mammalian 20s<br>Proteasome at 2.75<br>Å Resolution | 21465649 | 607 | 65 | 21.9 |
|---------------------------------------------------------------------------------------------|----------|-----|----|------|

1 **ttimavqfdg gvvlgadsrt** ttgsyianrv tdkltpihdr ifccr**sgsaa dtqavadavt**  
61 **yqlgfhsiel nepplvhtaa slfkemcyry redlmagiii agwdpqqggq vysvpmggmm**  
121 **vrqsfaiggs gssyiygyvd atyregmtke eclqftanal alamerdgss ggvirllaiaa**  
181 **esgverqvll gdqipkfava** tlppa

### *Spermadhesins & Other Acrosome-Associated Proteins:*

|                  |          |     |    |      |
|------------------|----------|-----|----|------|
| Spermadhesin AWN | 66990208 | 761 | 74 | 16.9 |
|------------------|----------|-----|----|------|

1 mklgsailwa lllstatlvs gawnrrsrsc ggvlr**dppgk ifnsdgpqkd cvwtikvkph**  
61 **fhvvlaippl nlscgkeyve lldgppgsei igkicggisl vfrsssniat ikylrtsqqr**  
121 **aspfhiyya dpegplpfpy ferqtiiate knip**

|                                                         |          |     |    |      |
|---------------------------------------------------------|----------|-----|----|------|
| Major Seminal<br>Plasma Glycoprotein<br>PSP-I precursor | 47523176 | 275 | 46 | 14.5 |
|---------------------------------------------------------|----------|-----|----|------|

1 mklgsaipwa lllstatlis tgwgldyhac ggrr**ltddygt iftykgpkte cvwtlqvdpk**  
61 **ykllvsiptl nltcgkeyve ilegapgsk lqkfceglsi lnrqssgmtv kykrdsghpa**  
121 **spyeiiflrd** sqg

|                                         |          |     |    |    |
|-----------------------------------------|----------|-----|----|----|
| Seminal Plasma Sperm Motility Inhibitor | 72535165 | 419 | 69 | 15 |
|-----------------------------------------|----------|-----|----|----|

1 mklgsaipwa lllstatlvs taqnkgsddc ggflk**nysgw isyykalttn cvwtiemkpg**  
61 **hkiilqilpl nltcgkeyle vrdqragpdn flkvcggttf vyqsssnvat vkysrdshhp**  
121 **assfnvyfyg ipqgaka**

|                                                    |          |     |    |      |
|----------------------------------------------------|----------|-----|----|------|
| Sp32 Acrosin-binding protein (degradation product) | 75052483 | 940 | 26 | 60.5 |
|----------------------------------------------------|----------|-----|----|------|

1 qlaagsllsl lkvlllplap apaqdansas tpgsplspte yerffalltp twkaettcrl  
61 rathgcrnpt lvqldqyenh glvpdgavcs dlpyaswfes fcqftqyracs nhvyyakrvr  
121 csqpvsilsp nslkevdts evpittmtsp vsshitatgr qvfqpwperl nnnveellqs  
181 slslggqeqg qehkqehkqe qgqehkqdeg qequeequeeq eeegkqeeqg gteesleams  
241 glqadsepkf qsefvssnpf sftprvreve stpmmmeni q elirsaqemd emgdvyeen  
301 iwr**aqspgsl lqlphvdall vlcsivent cvitptakaw qyledetlgf gksvcdslgr**  
361 **rhlaacsld fcslkleqch setnlqrqqc dnshktpfis pllasqsmi gtqigtksq**  
421 **rfygllygg lrmdfwarl atkgcednrv aswlqtefls fqdgdfptki cdteyvqypn**  
481 **ycafkssqqcm mnrnrdrkvsr mrclqnetyt vltqaksedl vlrwsqefst ltlgqag**

|                                     |        |     |    |     |
|-------------------------------------|--------|-----|----|-----|
| Seminal Plasma Acrosin Inhibitor A1 | 123986 | 177 | 67 | 7.6 |
|-------------------------------------|--------|-----|----|-----|

1 trkqpncnvy r**shlffctrq mdpicgtngk syanpcifcs ekglrnqkfd fghwghcrey**  
61 tsars

|                                      |          |     |    |      |
|--------------------------------------|----------|-----|----|------|
| Seminal Plasma Protein pB1 precursor | 47523184 | 178 | 43 | 15.4 |
|--------------------------------------|----------|-----|----|------|

1 maprlgifll wagvsvflpl dpvngdqhlp gr**fltpaits ddkcvfpfiy kgnlyfdctl**  
61 hdstyywcsv ttyymkrwry crstdyar**ca lpfifrgkey dscikegsvf skywcpvtpn**  
121 **ydqdr**awryc

***Disintegrins (ADAM Family) Proteins:***

|                                                               |           |     |    |      |
|---------------------------------------------------------------|-----------|-----|----|------|
| Disintegrin and metalloproteinase domain-containing protein 5 | 323276507 | 443 | 23 | 45.1 |
|---------------------------------------------------------------|-----------|-----|----|------|

1 mhsggvkdfs tcslddfkyf aahsgltclh silldepyvk qrrricngi leggeqcdcg  
61 tlencthkhc cdprtcrkr nkqcgsgecc tqdck**irpan vicrksadec** dfieycngty  
121 shcvadtfar ngqscesgsa ycyggcrsf tkqcr**nligg estgasfscf deinsrkdrf**  
181 gncgr**eycny phllcgklvc** nwphkylisr anlsviyshv req**mcvstfl naekiprdti**  
241 **ttvqfpgdrd rtfvqdgvc** gpemfclnfs cveikyrvny gecnssrhcn angvcnnfnh  
301 chck**kgfvpp dcnvgnfgs iddgqskvg** prrlwegkvl pskhrfqlif yislpvliia  
361 ttaiiikqnk irelcyrget esegsvsees ssssklsptv sns1

|                                                                     |           |     |    |      |
|---------------------------------------------------------------------|-----------|-----|----|------|
| Disintegrin and metalloproteinase domain-containing protein 20-like | 311261282 | 322 | 26 | 82.5 |
|---------------------------------------------------------------------|-----------|-----|----|------|

1 mgpasasaqql rgdpcplllw lflgpicsy appgwrftas eiviprkvsh rvstaeiqgg  
 61 lsykirfagg rhvvhmrchk sllprhfpvi tdndqgamqe dypfvprdcy yygylegvpq  
 121 smgtldtchg glrgmlqvdd ftyeikplea sskfehvisl lvtqktged ekckiggedt  
 181 nqadeealla empr**agpvym wphr**kyikl lytvahsyfl lnpnqtsvie nvvimnilh  
 241 siyfqaqlev cir**vlciwna gdgmrl**diwr dggslvtr**fg lwk**mqrw**qgm iph**dtavllt  
 301 **gr**rfgndryy ahrggicnpg wgasfvcvgn nhiflastla ahtlghmigc rhdgpggrcf  
 361 rrdkcvmapc tglldmlsnc syvtlhevvh rwdpclstsn vpynnfpyva nrcgdkklda  
 421 reecdcgtnk dcaedpcen sciltlgstc segsccvcgn yaqpgmrcdr vlgidlpey  
 481 ctglthtcpd dsiyiqdgtpc splavcvkgn csdr**dmqcqa lfgfnvkeaa picyr**tlnmr  
 541 gdrfgncgvr virgggkpvk **ce**eddim**cgm lhcanvq**kip gggehttfrh ivvhdvtpkt  
 601 **c**fgfdah**fgt ltpqlglvvd gascgpgqfc kdq**nctfypd lnfscdvstc nfrgvcnrr  
 661 **hchcqqgwkp pncdvegggg svdsgpppdk rketrakirm svnievalll arfallc**isg  
 721 **iigslfhlre vvdqryeeta sekl**

### Other Sperm Proteins & eGFP:

|             |           |      |    |      |
|-------------|-----------|------|----|------|
| Lactadherin | 172072653 | 1264 | 49 | 47.8 |
|-------------|-----------|------|----|------|

1 mppgrlltai cgallcasgl fafsgdfcds sqclnggtcl ldqdpqnpfh clcpegftgl  
 61 icnetekgpc fnpnchndae ceviddahrg **dvftqyick**c phgytgihce iicnaplgme  
 121 tgaiadfqis assmhlqfmg lqrwapelar lhragivnaw **tasnydrnpw iqvnllr**rmr  
 181 vtgvvtqgas ragsaeyikt fkvaissydr **kfqfiqgae sgdki**fmgnl **dnsglkvnlf**  
 241 **evplevqyvr lvp**iichrgc tlr**fellgce lsgca**eplgl **kdntipnkqi tassf**yrtwg  
 301 **lsafswypfy ar**ldnqgkfn **awtaqsnsas ewlqidlgsq rrv**tgiitqg ardfghi**qyv**  
 361 **aaykvaysdd gvs**wteyrdq galegk**ifpg nldnshkkn mfetp**fltrf vrilpvawhn  
 421 **rit**lrvellg c

|                                    |                                    |     |    |    |
|------------------------------------|------------------------------------|-----|----|----|
| Enhanced Green Fluorescent Protein | 13194618<br>GenBank:<br>AAK15492.1 | 713 | 42 | 27 |
|------------------------------------|------------------------------------|-----|----|----|

1 mvsk**geelft gvpilv**eld **gdvnghkfsv sgege**daty **gk**ltlkfict tgklpvpwpt  
 61 lvtltlygvq cfsrypdmk qhdffks**amp egyptertif fkddgnyk**tr aevk**fegdtl**  
 121 **vnri**el**kgid fkedgnilgh kleynynshn vyimadkqkn** gikvnfkih niedgsvqla  
 181 dhyqqntpig dgpvllpdnh ylstsalsk dpnekrdhmv llefvtaagi tlgmdelyk

|                 |           |     |    |      |
|-----------------|-----------|-----|----|------|
| Ropporin-1-like | 301783203 | 404 | 33 | 23.9 |
|-----------------|-----------|-----|----|------|

1 mpqtdk**qici ppelpellk**q ftkaaairtqp qdliqwaady fgamshgeip pvrerserva  
 61 **lsn**waelt**pe llkilhsrva grliihadel aqm**wkvlslp tdlfnsvmnv **grfteeiewl**  
 121 **kflalacss1 gv**tiaktlki **vcevlssdh**d **ggppr**ipfst fqflytyiae vdgeisashv  
 181 **srmlnyieqe vigpdglik**v ndftqnrprv le

## SUPPLEMENTAL REFERENCES

1. Abeydeera, L.R., et al., *Maturation in vitro of pig oocytes in protein-free culture media: fertilization and subsequent embryo development in vitro*. Biol Reprod, 1998. **58**(5): p. 1316-20.
2. Yoshioka, K., et al., *Birth of piglets derived from porcine zygotes cultured in a chemically defined medium*. Biol Reprod, 2002. **66**(1): p. 112-9.
3. Haraguchi, C.M., et al., *Possible function of caudal nuclear pocket: degradation of nucleoproteins by ubiquitin-proteasome system in rat spermatids and human sperm*. J Histochem Cytochem, 2007. **55**(6): p. 585-95.
4. Kierszenbaum, A.L., E. Rivkin, and L.L. Tres, *Cytoskeletal track selection during cargo transport in spermatids is relevant to male fertility*. Spermatogenesis, 2011. **1**(3): p. 221-230.
5. Rivkin, E., et al., *Rnf19a, a ubiquitin protein ligase, and Psmc3, a component of the 26S proteasome, tether to the acrosome membranes and the head-tail coupling apparatus during rat spermatid development*. Dev Dyn, 2009. **238**(7): p. 1851-61.
6. Mochida, K., L.L. Tres, and A.L. Kierszenbaum, *Structural features of the 26S proteasome complex isolated from rat testis and sperm tail*. Mol Reprod Dev, 2000. **57**(2): p. 176-84.
7. Yi, Y.J., et al., *Sperm-surface ATP in boar spermatozoa is required for fertilization: relevance to sperm proteasomal function*. Syst Biol Reprod Med, 2009. **55**(2): p. 85-96.
